# Supplementary material
Source: publisher figshare collection journal article supplement (https://acs.figshare.com/ndownloader/files/4471852)
Supplement: Supplementary file 1 [file 4471852]

## Supplementary Data:

$^1\text{H}$  NMR ( $\text{CDCl}_3$ ): 1.44 (t, 3H,  $\text{CH}_3$ ;  $^2J = 7.1$  Hz), 4.48 (q, 2H,  $\text{CH}_2$ ;  $^2J = 7.1$  Hz), 7.42 (m, 2H, m-CH), 7.82 (m, 1H, p-CH), 8.76 (m, 2H, o-CH).

$^{13}\text{C}$  ( $\text{CDCl}_3$ ) : 14.2 ( $\text{CH}_3$ ), 74.4 ( $\text{CH}_2$ ), 125.0, 138.4, 149.6 ( $\text{C}_5\text{H}_5\text{N}$ ), 231.5 (CO)

Micro Analysis: Found (Calc) for  $\text{C}_{16}\text{H}_{20}\text{N}_2\text{S}_4\text{O}_2\text{Cd}$ : C 37.3 (37.5), H 3.95 (3.93), N 5.34 (5.46)

### Transient absorption spectroscopy measurements:

Transient absorption data were collected using a highly sensitive microsecond absorption systems under  $\text{N}_2$ . Data was collected using an excitation wavelength of 567 nm, with pulse width 0.6 ns and pulse energy density of 60-80  $\mu\text{J cm}^{-2}$  at 4 Hz repetition from a dye laser (Photon Technology International Inc. GL-301) pumped by a nitrogen laser (Photon Technology International Inc. GL-3300). Samples were probed using a quartz halogen lamp (Bentham, IL1) with a stabilized power supply (Bentham, 605). Probe light was detected by a silicon photodiode and the signal subsequently amplified and passed by electronic band-pass filters to improve signal to noise.

# TGA of **1**

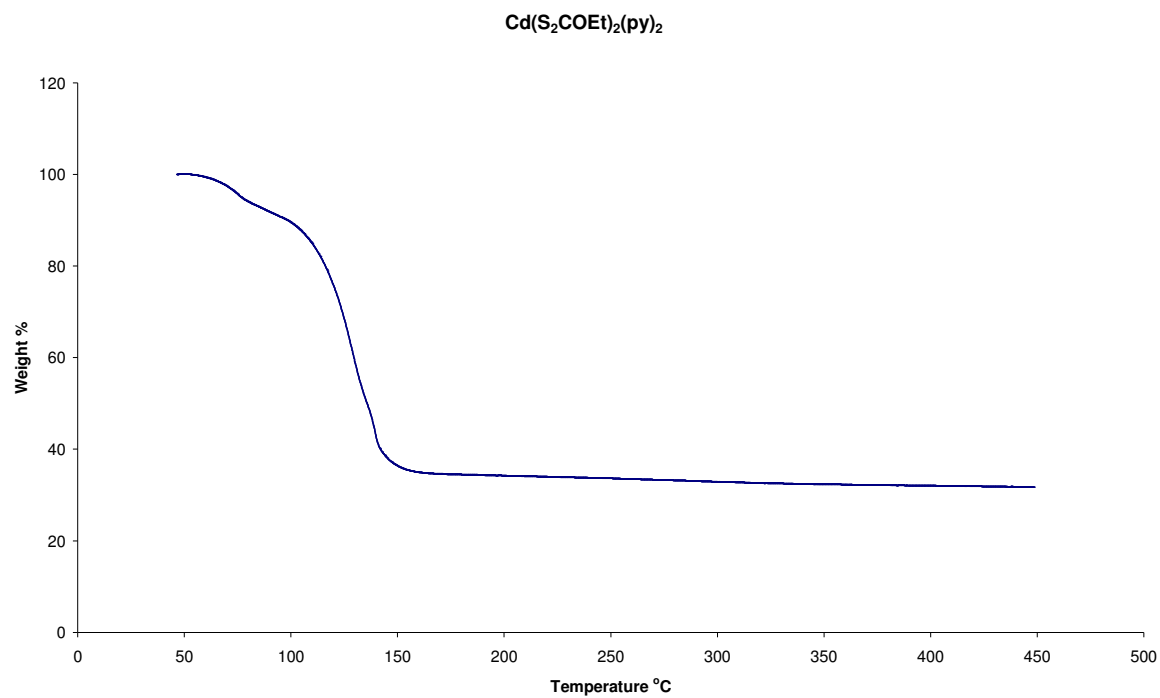

## Crystallography:

Crystallographic data for the structural analysis (in CIF format) has been deposited with the Cambridge Crystallographic Data Center, CCDC no. 753046. Copies of this information may be obtained from the Director, CCDC, 12 Union Road, Cambridge, CB21EZ, UK (Fax: +44-1233-336033; e-mail: [deposit@ccdc.cam.ac.uk](mailto:deposit@ccdc.cam.ac.uk) or [www.ccdc.cam.ac.uk](http://www.ccdc.cam.ac.uk)).

Table 1. Crystal data and structure refinement for 1.

|                                   |                                                                                 |
|-----------------------------------|---------------------------------------------------------------------------------|
| Identification code               | h09kcm32                                                                        |
| Empirical formula                 | C <sub>16</sub> H <sub>20</sub> Cd N <sub>2</sub> O <sub>2</sub> S <sub>4</sub> |
| Formula weight                    | 512.98                                                                          |
| Temperature                       | 150(2) K                                                                        |
| Crystal system                    | Monoclinic                                                                      |
| Space group                       | P 2 <sub>1</sub> /c                                                             |
| Unit cell dimensions              | a = 10.1957(3) Å; $\alpha$ = 90°                                                |
|                                   | b = 13.1149(3) Å; $\beta$ = 104.450(2)°                                         |
|                                   | c = 16.4045(3) Å; $\gamma$ = 90°                                                |
| Volume                            | 2124.15(9) Å <sup>3</sup>                                                       |
| Z                                 | 4                                                                               |
| Density (calculated)              | 1.604 Mg/m <sup>3</sup>                                                         |
| Absorption coefficient            | 1.433 mm <sup>-1</sup>                                                          |
| F(000)                            | 1032                                                                            |
| Crystal size                      | 0.25 x 0.20 x 0.20 mm                                                           |
| Theta range for data collection   | 4.13 to 27.51 deg.                                                              |
| Index ranges                      | -13 ≤ h ≤ 13; -17 ≤ k ≤ 17; -21 ≤ l ≤ 21                                        |
| Reflections collected             | 40865                                                                           |
| Independent reflections           | 4864 [R(int) = 0.0936]                                                          |
| Reflections observed (>2σ)        | 3647                                                                            |
| Data Completeness                 | 0.995                                                                           |
| Max. and min. transmission        | 0.7626 and 0.7159                                                               |
| Refinement method                 | Full-matrix least-squares on F <sup>2</sup>                                     |
| Data / restraints / parameters    | 4864 / 0 / 255                                                                  |
| Goodness-of-fit on F <sup>2</sup> | 1.055                                                                           |
| Final R indices [I > 2σ(I)]       | R <sub>1</sub> = 0.0335 wR <sub>2</sub> = 0.0660                                |
| R indices (all data)              | R <sub>1</sub> = 0.0577 wR <sub>2</sub> = 0.0733                                |
| Largest diff. peak and hole       | 0.445 and -0.755 e. Å <sup>-3</sup>                                             |
